# Supplementary material for: A Novel Application of Artificial intelligence technology for Outdoor High-Voltage Composite Insulators
Source: Research Square preprint supplement (doi:10.21203/rs.3.rs-2910592/v1), 2023-05-16
Supplement: Supplementary file 1 [file a80556acfd9e5500a54c8d74.docx]

**Table 1.** Design parameters of studied composite insulator in mm.

| N0 | P | L | d1/d2 | N1/N2 | D1/D2 | D |
| --- | --- | --- | --- | --- | --- | --- |
| A | 2037 | 6510 | 36/75 | 25/25 | 140/110 | 25 |

**Table 2.** Corona ring parameters and their levels

| **Parameters** | **significations** | **variation ranges** | | |
| --- | --- | --- | --- | --- |
| Corona ring height | H | 0 | 200 | 400 |
| Corona ring radius | R | 150 | 250 | 350 |
| Corona ring tube diameter | Dr | 20 | 50 | 80 |

**Table 3.** Computational results.

| **CR Parameters** | | | **Results** |
| --- | --- | --- | --- |
| **H** | **R** | **Dr** | **E** |
| 0 | 150 | 20 | 4.100 |
| 0 | 150 | 50 | 3.235 |
| 0 | 150 | 80 | 2.610 |
| 0 | 250 | 20 | 4.260 |
| 0 | 250 | 50 | 3.545 |
| 0 | 250 | 80 | 3.035 |
| 0 | 350 | 20 | 4.480 |
| 0 | 350 | 50 | 3.860 |
| 0 | 350 | 80 | 3.410 |
| 200 | 150 | 20 | 3.460 |
| 200 | 150 | 50 | 2.650 |
| 200 | 150 | 80 | 2.093 |
| 200 | 250 | 20 | 3.850 |
| 200 | 250 | 50 | 3.120 |
| 200 | 250 | 80 | 2.615 |
| 200 | 350 | 20 | 4.200 |
| 200 | 350 | 50 | 3.550 |
| 200 | 350 | 80 | 3.100 |
| 400 | 150 | 20 | 4.140 |
| 400 | 150 | 50 | 3.580 |
| 400 | 150 | 80 | 3.205 |
| 400 | 250 | 20 | 4.240 |
| 400 | 250 | 50 | 3.665 |
| 400 | 250 | 80 | 3.280 |
| 400 | 350 | 20 | 4.420 |
| 400 | 350 | 50 | 3.870 |
| 400 | 350 | 80 | 3.490 |

**Table 4.** Optimized corona ring parameters

| **Parameters (mm)** | **Optimized value** | **Electric Field [kV/cm]** |
| --- | --- | --- |
| Corona ring position (H) | 128.2 | 1.75 |
| Corona ring radius (R) | 150 |
| Corona ring tube Diameter ( Dr) | 80 |

**Table 5.** Comparaison between PSO and BA.

| Method | PSO | Bat Algorithm (BA) |
| --- | --- | --- |
| Electric Field [kV/cm] | 1.55 | 1.29 |
| time(s) | very high | less |
| Convergence | Good convergence | Fast and better convergence |
| Accuracy | Accurate | High accurate |
| complexity | Not complex | Less complex |
